# Supplementary figures and images for: A novel function of poly(ADP-ribose) polymerase-1 in modulation of autophagy and necrosis under oxidative stress
Source: Springer Nature journal article supplement (doi:10.1038/cdd.2008.151), 2008-10-31

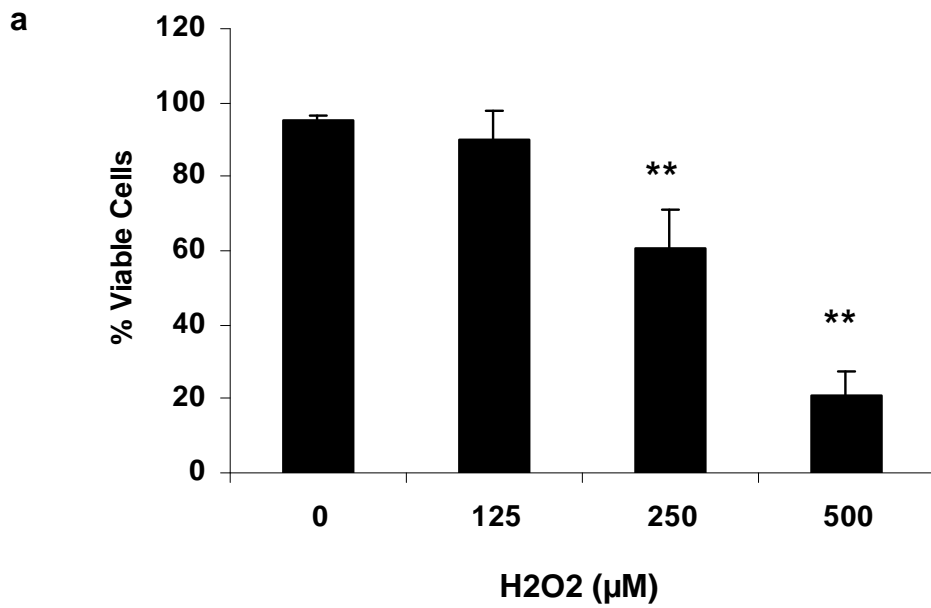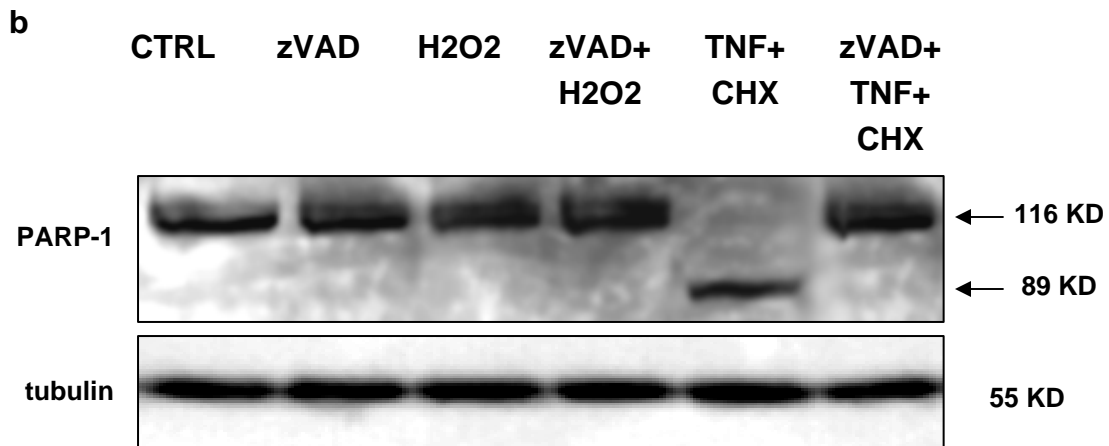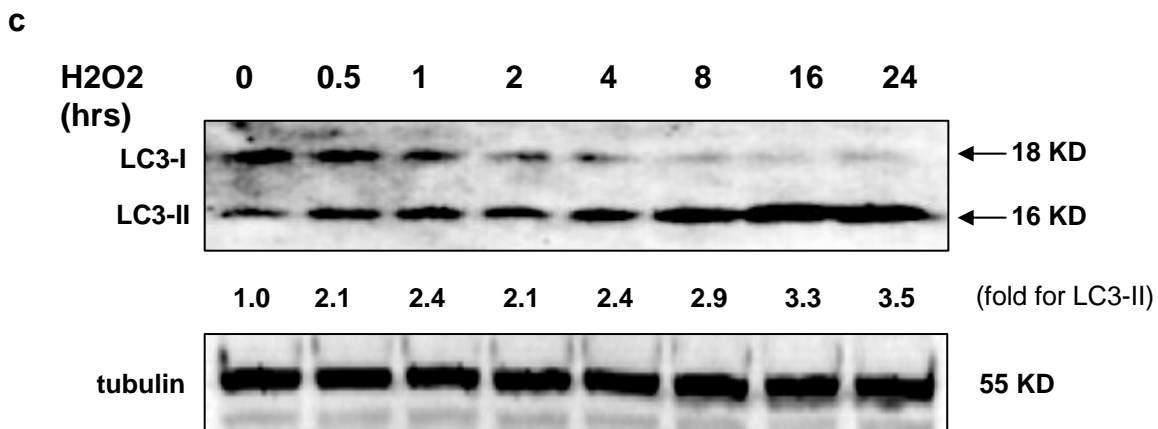

Suppl Fig. 1

d

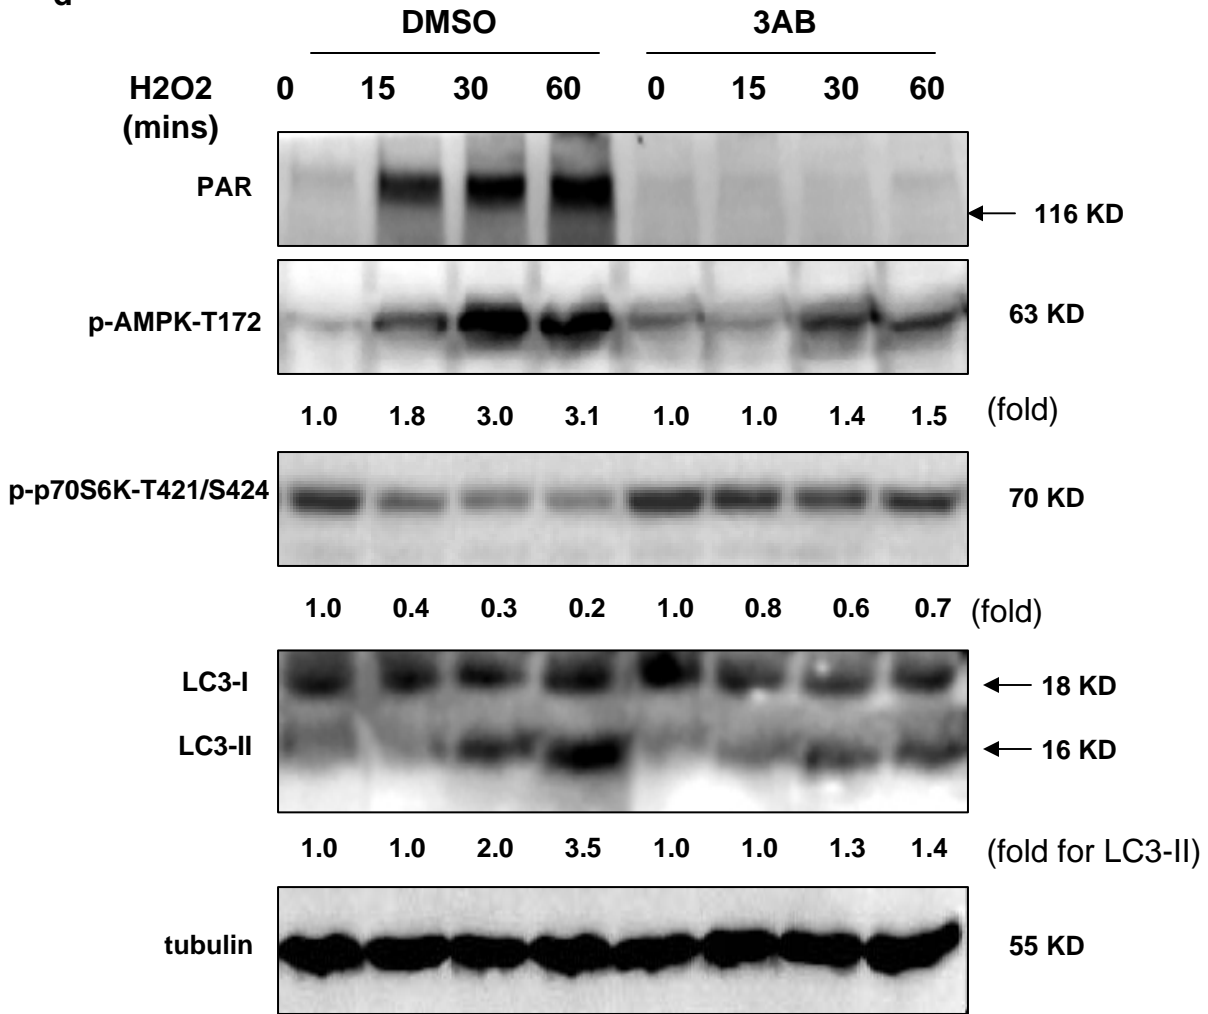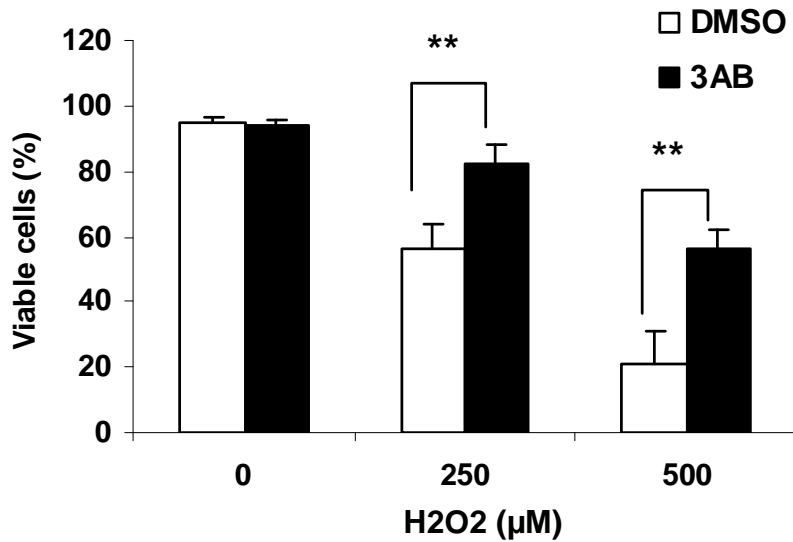

e

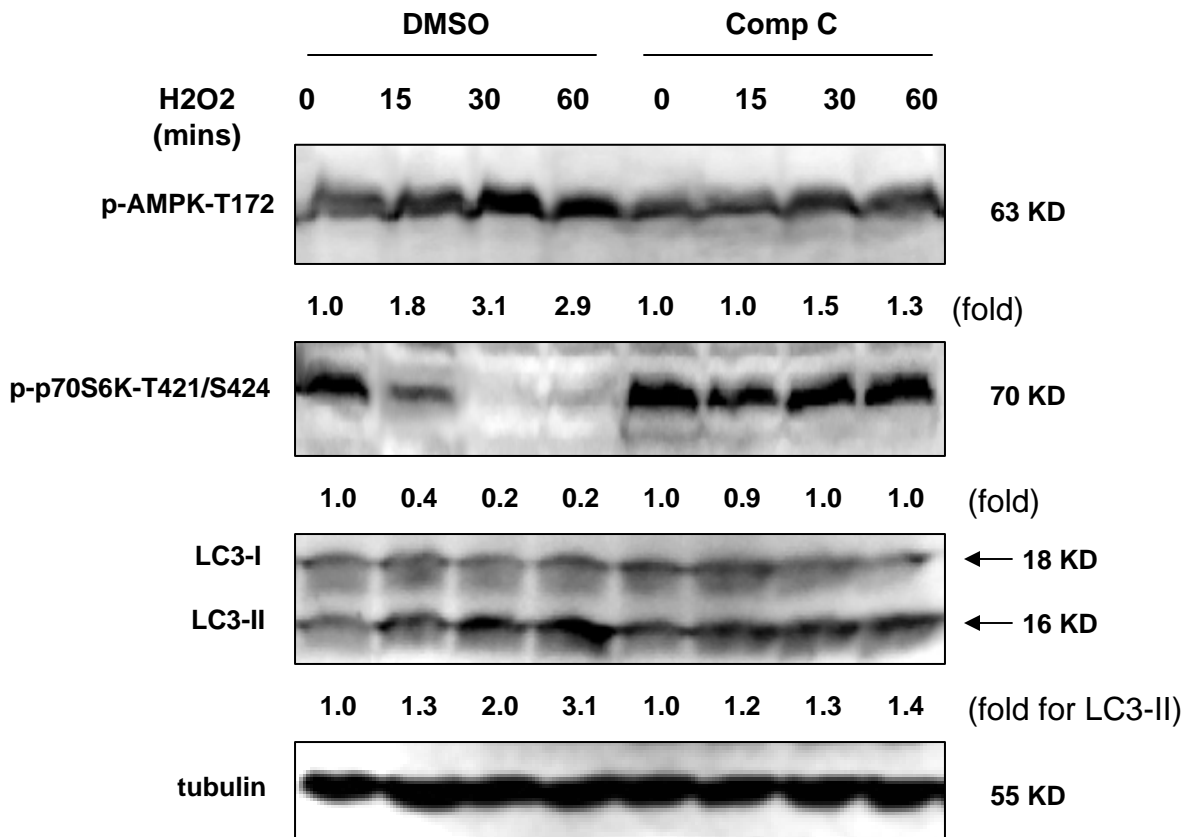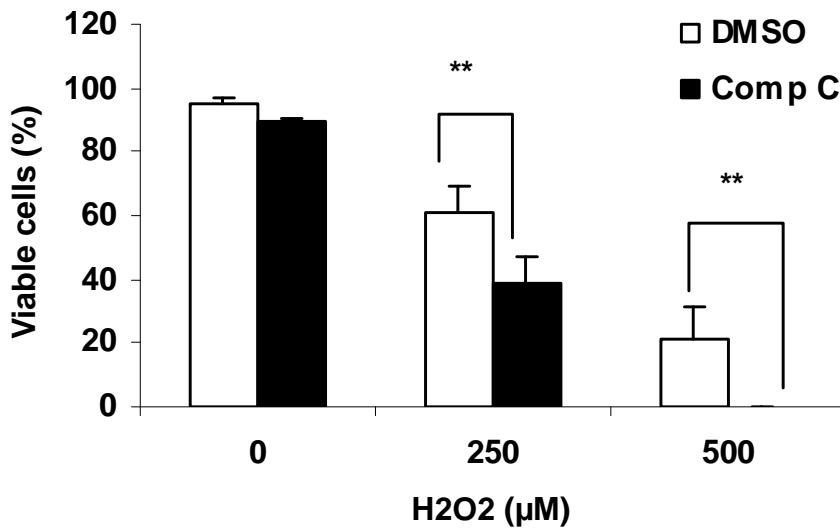

Suppl Fig. 1 continued

f

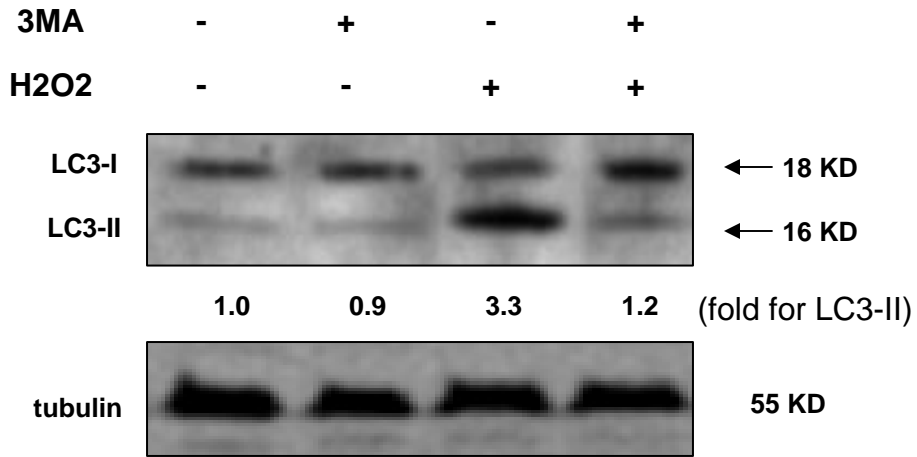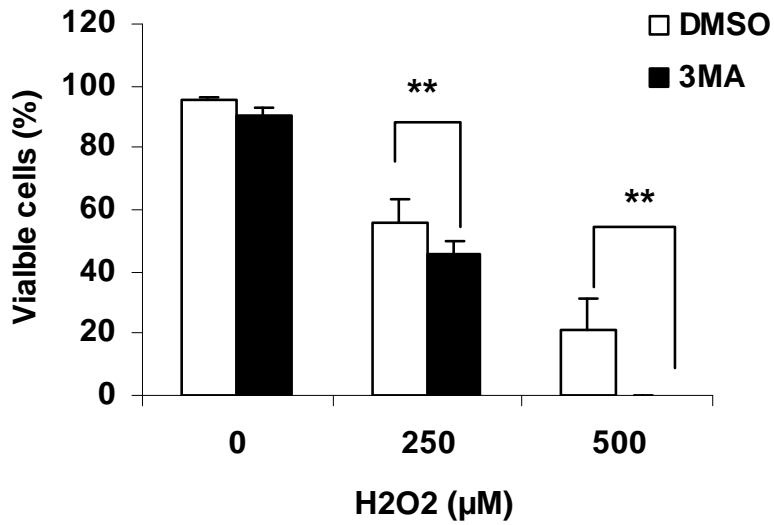

g

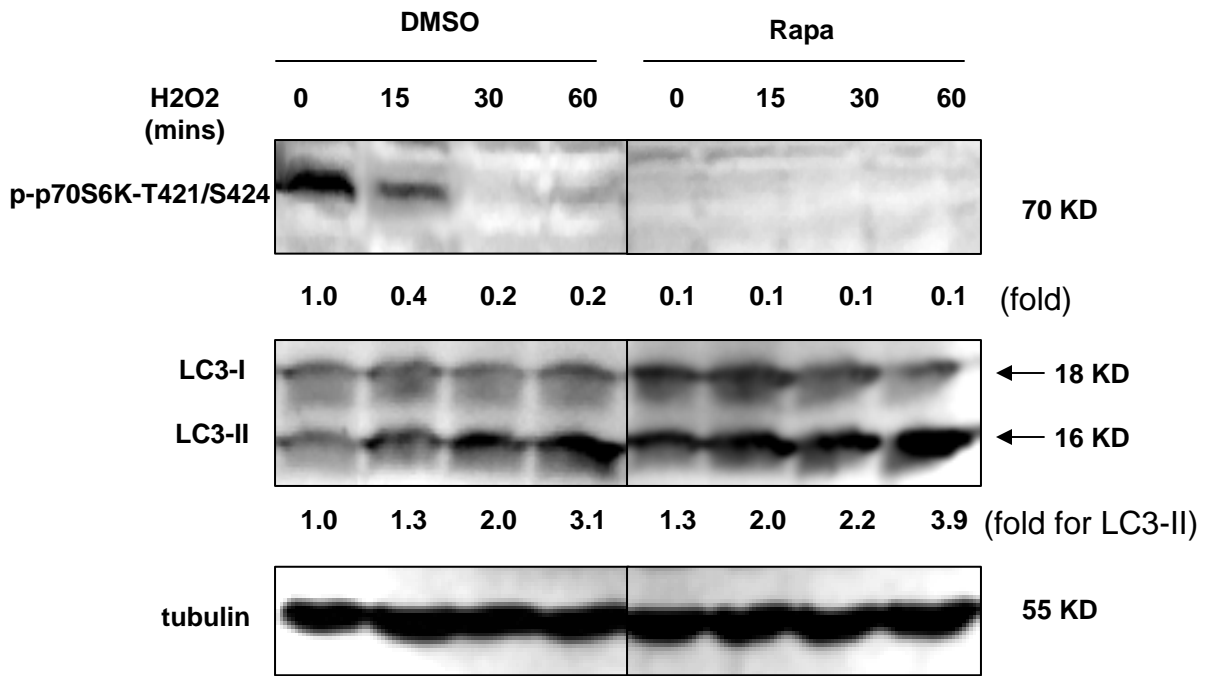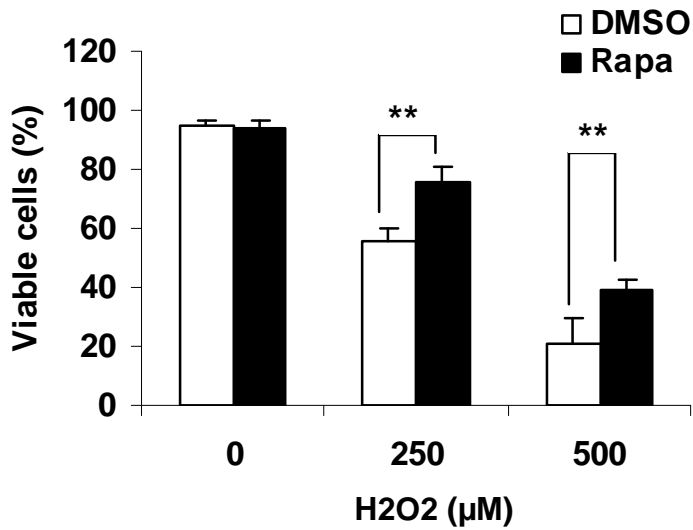

Suppl Fig. 1 continued

a

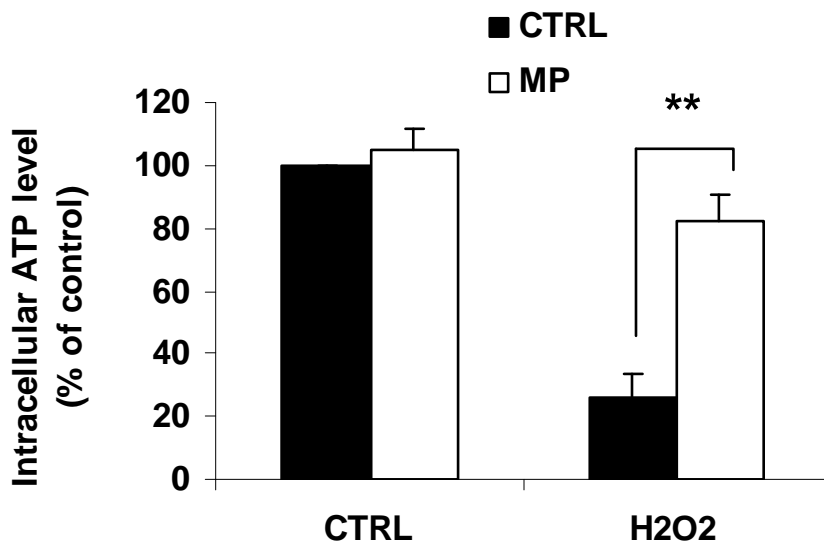

b

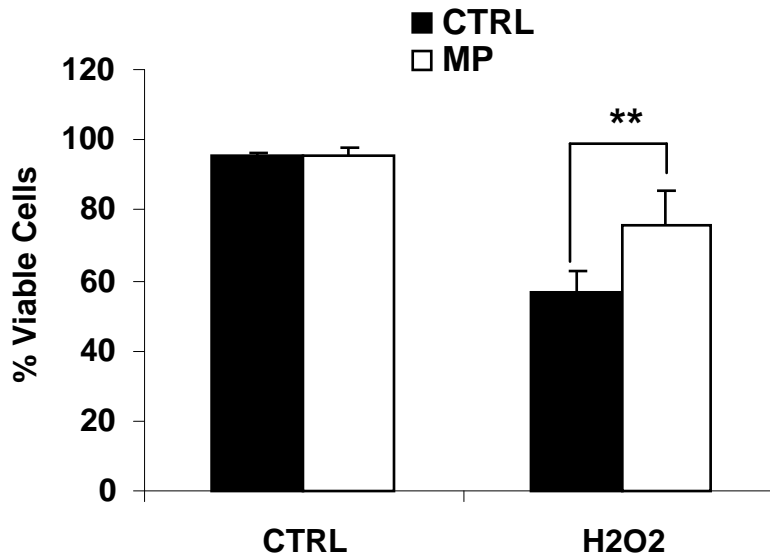

**c**

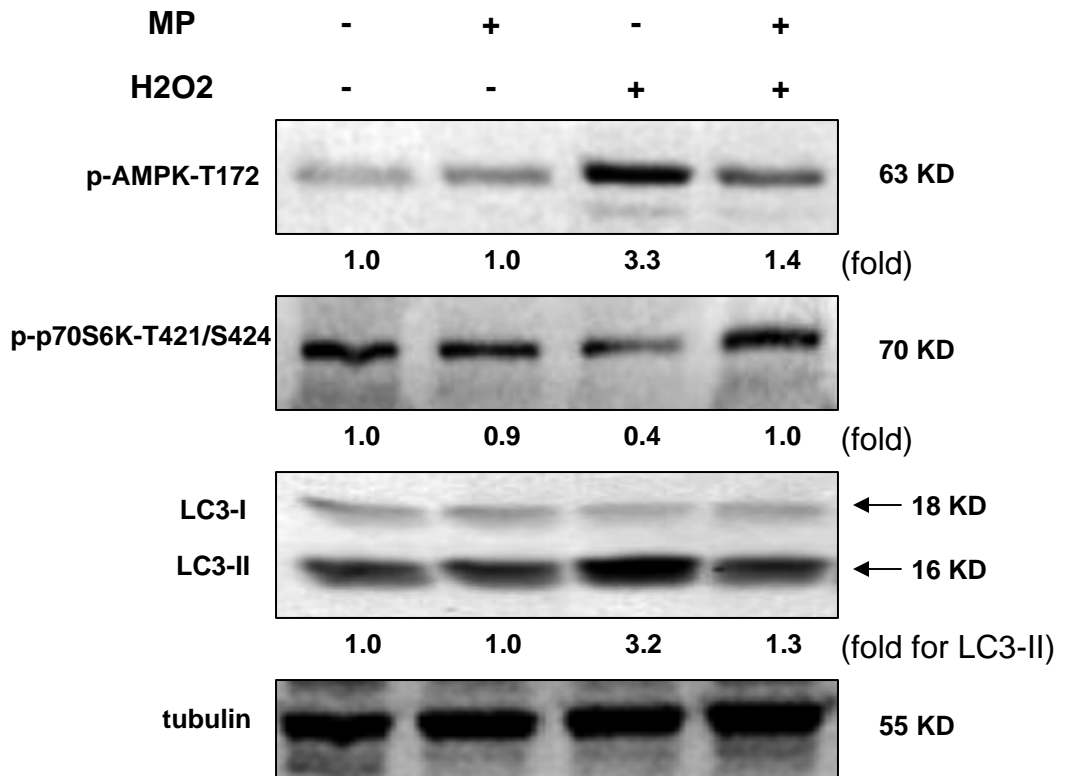

Supplement: 41418_2009_BFcdd2008151_MOESM20_ESM.pdf [file 41418_2009_BFcdd2008151_MOESM20_ESM.pdf]
